# Supplementary material
Source: publisher figshare collection journal article supplement (https://acs.figshare.com/ndownloader/files/4184074)
Supplement: Supplementary file 1 [file 4184074]

## Chemically detachable polyelectrolyte multilayer platform for cell sheet engineering

*Armelle Chassepot, Longcheng Gao, Isabelle Nguyen, Alexandre Dochter, Florence Fioretti, Patrick Menu, Halima Kerdjoudj, Corinne Baehr, Pierre Schaaf, Jean-Claude Voegel\*, Fouzia Boulmedais, Benoit Frisch and Joëlle Ogier\**

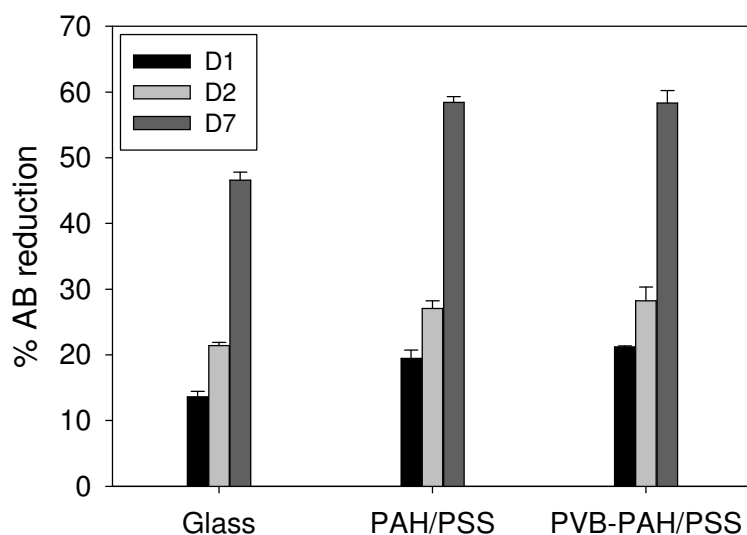

**Figure S-1:** Viability of HGFs, measured by Alamar Blue™ test, cultured on a glass substrate, on (PAH/PSS)<sub>10</sub>-PAH film, named PAH/PSS and (PVBANH<sub>3</sub><sup>+</sup>/PVBACOO<sup>-</sup>)<sub>10</sub>-(PAH/PSS)<sub>10</sub>-PAH film, named PVB-PAH/PSS.

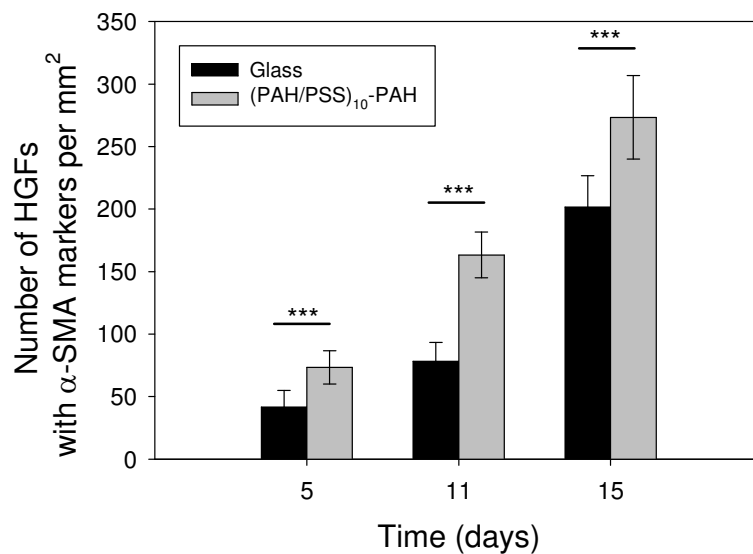

**Figure S-2:** Number of HGFs, presenting  $\alpha$ -SMA markers, seeded on a glass substrate and on a  $(\text{PAH/PSS})_{10}$ -PAH film after 5, 11 and 15 days of culture. The numbers represent the mean and standard deviation on at least 10 images of three experiments (\*\*\*)  $P < 0.001$  by Mann-Whitney test).

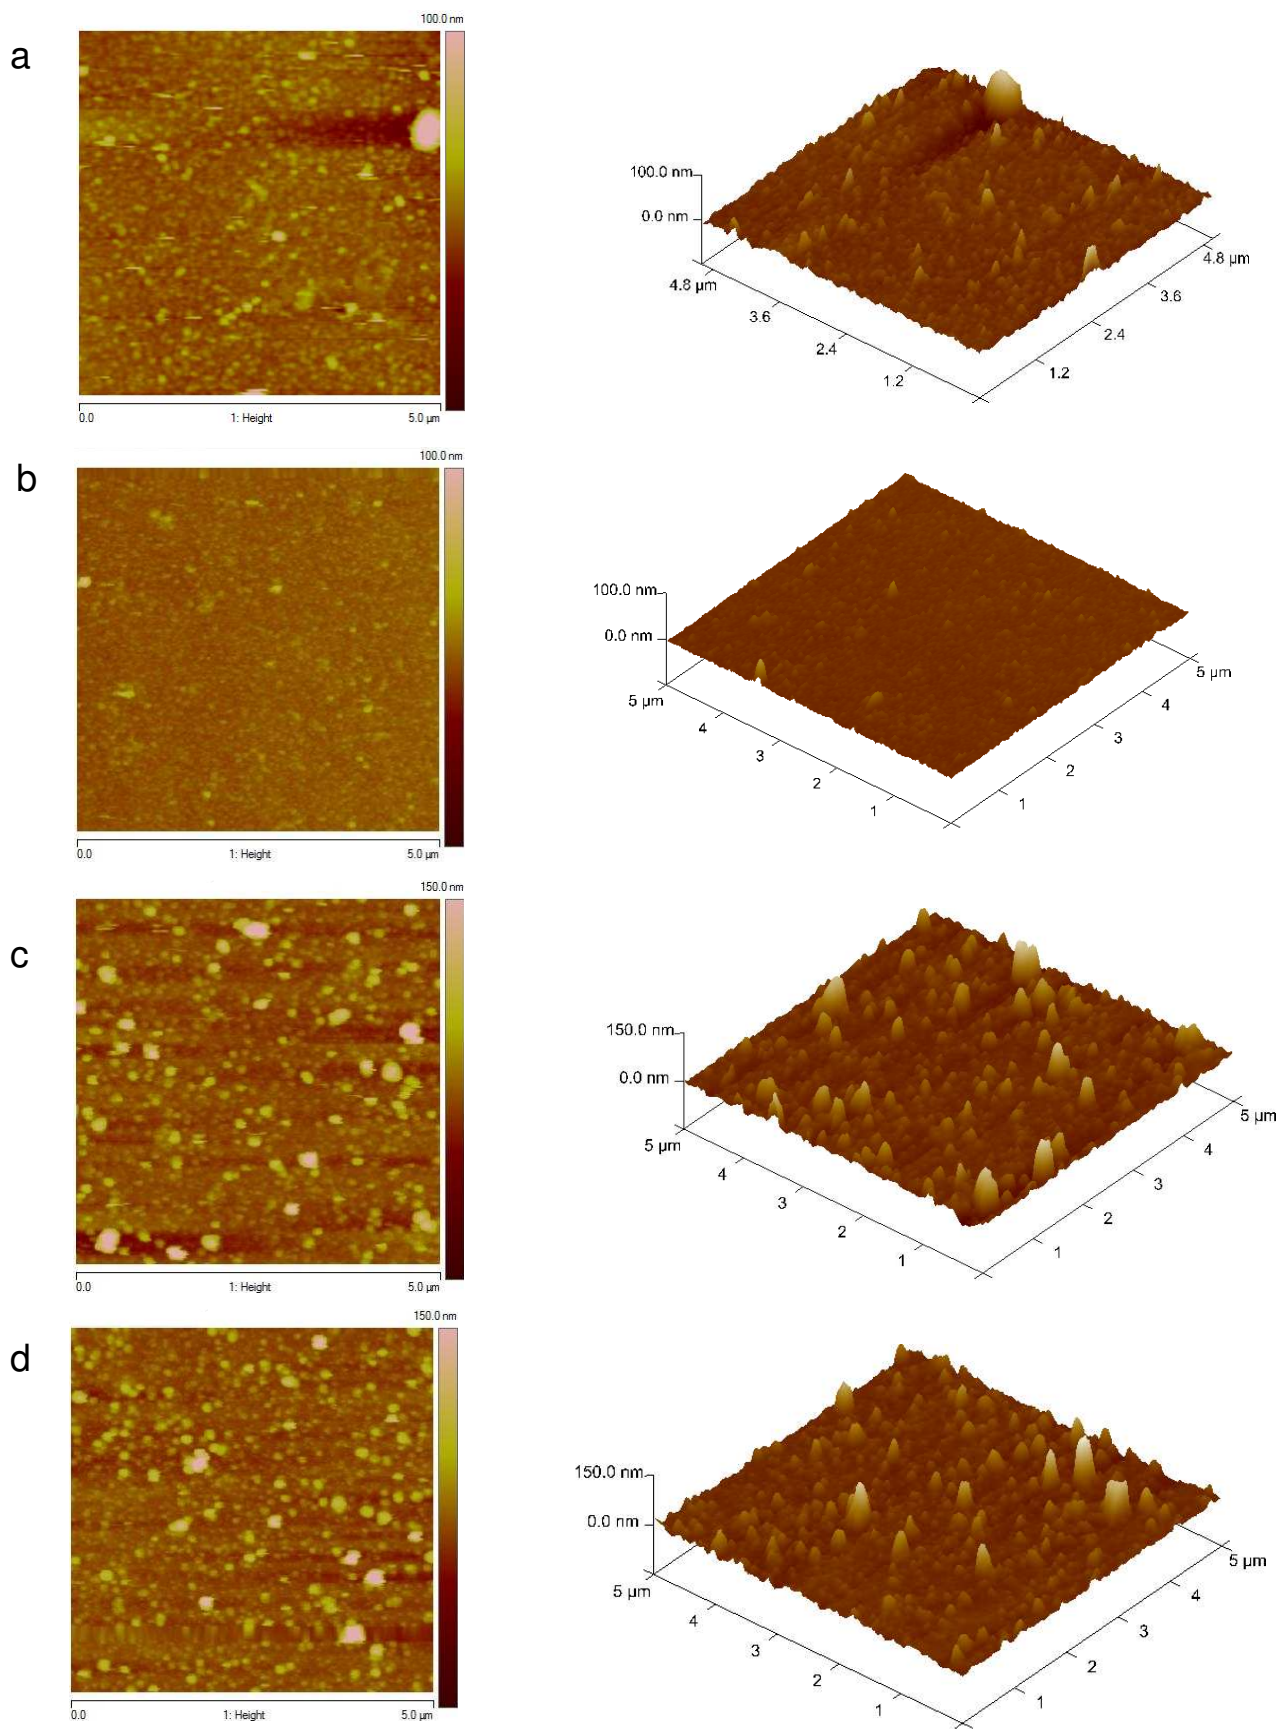

**Figure S-3:** Typical AFM images, obtained in contact mode in dry state, of PEI-(PVBACOO<sup>-</sup>/PVBANH<sub>3</sub><sup>+</sup>)<sub>7</sub> film (a) before and (b) after TCEP treatment (5 mM, 30 min) and of PEI-(PVBACOO<sup>-</sup>/PVBANH<sub>3</sub><sup>+</sup>)<sub>10</sub>-(PSS/PAH)<sub>10</sub> film (c) before and (d) after TCEP treatment (5 mM, 30 min).

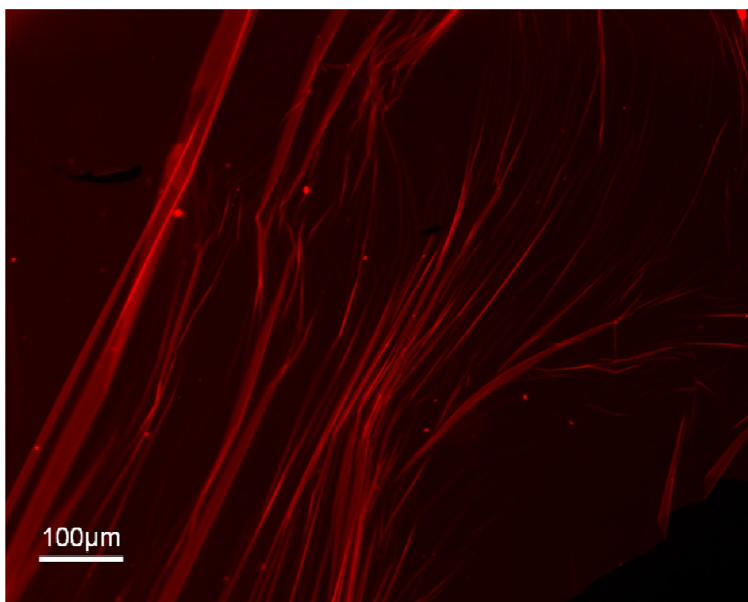

**Figure S-4:** Fluorescence microscopy image of a  $(\text{PVBANH}_3^+ / \text{PVBACOO}^-)_{10}-(\text{PAH/PSS-Rodhamine})_{10}$ -PAH film after its detachment by TCEP treatment.

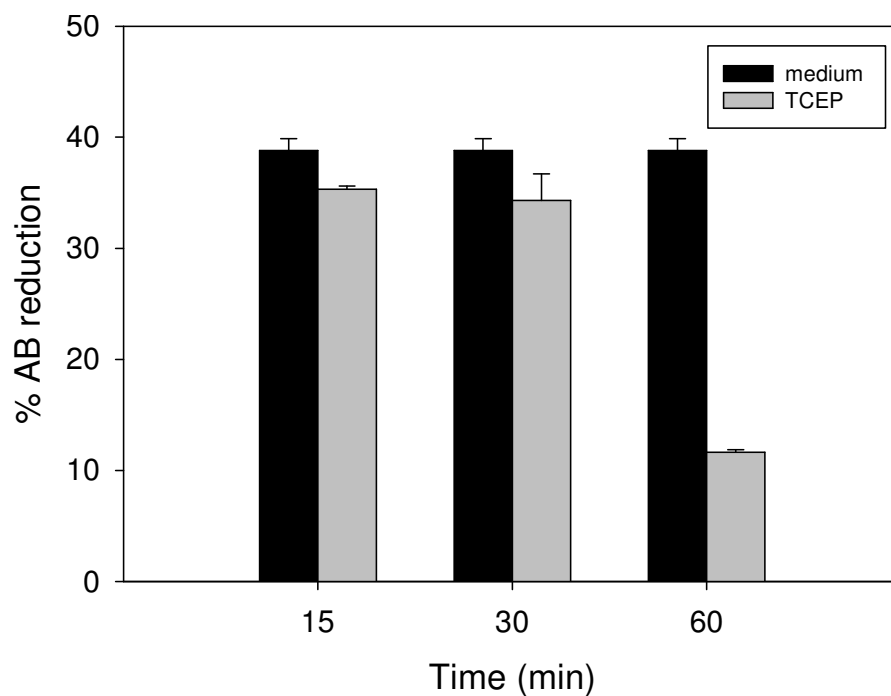

**Figure S-5** Viability of HGFs in contact with 5 mM TCEP and culture medium obtained by Alamar Blue™ test. HGF cells were previously cultured during 7 days on glass substrate and incubated with 1 mL of TCEP solution or culture medium during 60 min.

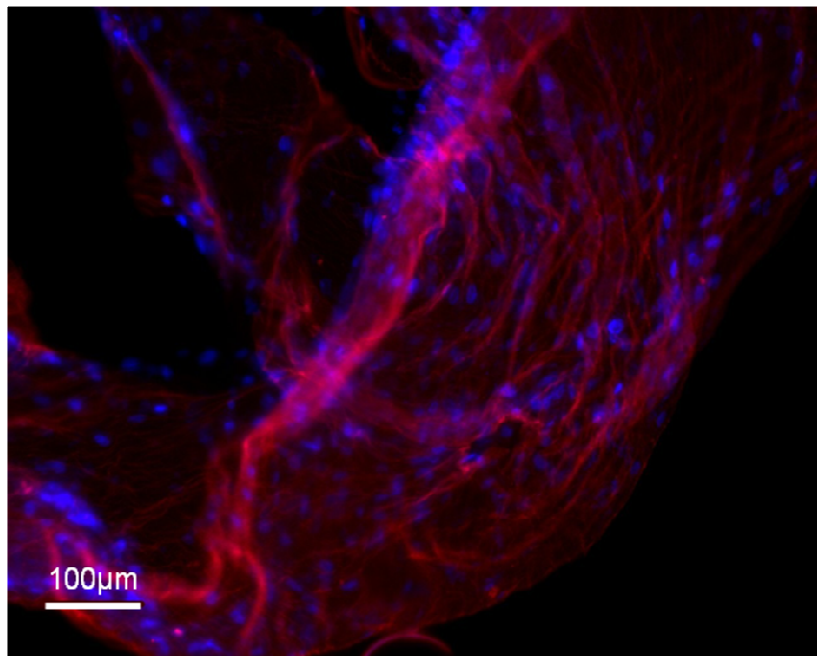

**Figure S-6:** Image of a HGFs sheet, with blue counterstaining of cells nuclei, recovered after 30 days of culture on  $(\text{PVBANH}_3^+/\text{PVBACOO-})_{10}\text{-(PAH/PSS-Rodhamine)}_{10}\text{-PAH}$  film and its detachment by TCEP treatment.
